# Supplementary material for: Core Lab Adjudication of the ACURATE neo2 Hemodynamic Performance Using Computed-Tomography-Corrected Left Ventricular Outflow Tract Area
Source: MDPI journal article supplement (doi:10.3390/jcm11206103), 2022-10-17
Supplement: s1 [file s1]

Table S1. Comparison among ACURATE<sub>neo2</sub> sizes and their interactions with methods (2D TTE & MDCT); The results of adjusted multiple Bayesian regression model.

| Parameters                               | Variable                          | Beta   | SE    | 95% CrI for Beta |
|------------------------------------------|-----------------------------------|--------|-------|------------------|
| EOA, (cm <sup>2</sup> )                  | TTE/MSCT                          | -0.642 | 0.11  | [-0.85, -0.43]   |
|                                          | Age (>82year/≤82 years)           | -0.007 | 0.06  | [-0.12, 0.11]    |
|                                          | Sex (Female/male)                 | -0.173 | 0.08  | [-0.33, -0.02]   |
|                                          | BMI (≥30/ <30 kg/m <sup>2</sup> ) | 0.318  | 0.18  | [-0.04, 0.66]    |
|                                          | BSA, (1.6 m <sup>2</sup> )        | -0.16  | 0.36  | [-0.89, 0.56]    |
|                                          | Neo2 size, 25mm/23mm              | 0.26   | 0.09  | [0.068, 0.44]    |
|                                          | Neo2 size, 27mm/23mm              | 0.72   | 0.1   | [0.51, 0.92]     |
|                                          | Size neo2 25mm* Group             | 0.436  | 0.14  | [0.16, 0.7]      |
|                                          | Size neo2 27mm* Group             | 0.377  | 0.14  | [0.11, 0.65]     |
| EOAi, (cm <sup>2</sup> /m <sup>2</sup> ) | TTE/MDCT                          | -0.214 | 0.04  | [-0.29, -0.14]   |
|                                          | Age (>82year/≤82 years)           | 0.022  | 0.04  | [-0.05, 0.1]     |
|                                          | Sex (Female/male)                 | -0.09  | 0.05  | [-0.19, 0.01]    |
|                                          | BMI (≥30/ <30 kg/m <sup>2</sup> ) | 0.063  | 0.06  | [-0.04, 0.17]    |
|                                          | BSA, (1.6 m <sup>2</sup> )        | -0.054 | 0.13  | [-0.31, 0.21]    |
|                                          | Neo2 size, 25mm/23mm              | -0.092 | 0.06  | [-0.21, 0.02]    |
|                                          | Neo2 size, 27mm/23mm              | -0.054 | 0.07  | [-0.18, 0.07]    |
|                                          | Size neo2 25mm* Group             | 0.084  | 0.05  | [-0.01, 0.18]    |
|                                          | Size neo2 27mm* Group             | 0.021  | 0.05  | [-0.08, 0.12]    |
| SV, (ml)                                 | TTE/MDCT                          | -7.296 | 3.77  | [-14.45, -0.14]  |
|                                          | Age (>82year/≤82 years)           | 3.69   | 2.65  | [-1.4, 8.79]     |
|                                          | Sex (Female/male)                 | -4.506 | 3.42  | [-11.17, 2.25]   |
|                                          | BMI (≥30/ <30 kg/m <sup>2</sup> ) | 3.181  | 3.93  | [-4.56, 10.73]   |
|                                          | BSA, (1.6 m <sup>2</sup> )        | 7.126  | 8.44  | [-9.49, 23.99]   |
|                                          | Neo2 size, 25mm/23mm              | -8.781 | 3.98  | [-16.29, -0.85]  |
|                                          | Neo2 size, 27mm/23mm              | -6.408 | 4.32  | [-15.02, 1.81]   |
|                                          | Size neo2 25mm* Group             | 4.997  | 2.85  | [-0.61, 10.45]   |
|                                          | Size neo2 27mm* Group             | 1.389  | 2.8   | [-4.02, 7.04]    |
| SVi, (ml/m <sup>2</sup> )                | TTE/MDCT                          | -6.219 | 1.49  | [-9.04, -3.3]    |
|                                          | Age (>82year/≤82 years)           | 2.619  | 1.43  | [-0.27, 5.43]    |
|                                          | Sex (Female/male)                 | -3.28  | 1.89  | [-6.86, 0.44]    |
|                                          | BMI (>30/ ≤30 kg/m <sup>2</sup> ) | 0.975  | 4.45  | [-7.4, 9.84]     |
|                                          | BSA, (1.6 m <sup>2</sup> )        | 7.369  | 9.12  | [-10.5, 25.16]   |
|                                          | Neo2 size, 25mm/23mm              | 3.972  | 18.27 | [-30.44, 41.81]  |
|                                          | Neo2 size, 27mm/23mm              | 11.533 | 18.06 | [-24.37, 47.62]  |
|                                          | Size neo2 25mm* Group             | 3.004  | 1.83  | [-0.5, 6.57]     |
|                                          | Size neo2 27mm* Group             | -0.281 | 1.9   | [-4.03, 3.37]    |

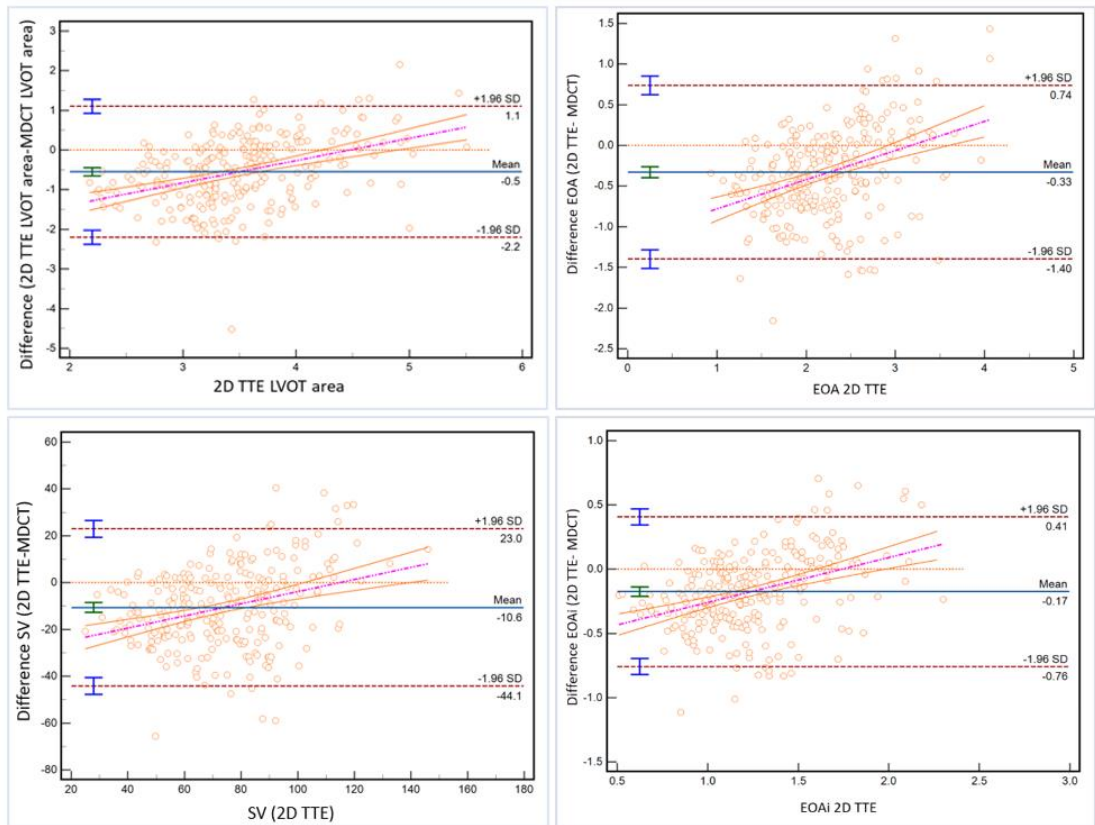

Figure S1: Bland-Altman plot showing the difference in calculated LVOT area (Upper left) EOA (Upper right), SV (Lower left) and EOAI (Lower right) using the 2D TTE and MDCT corrected method.

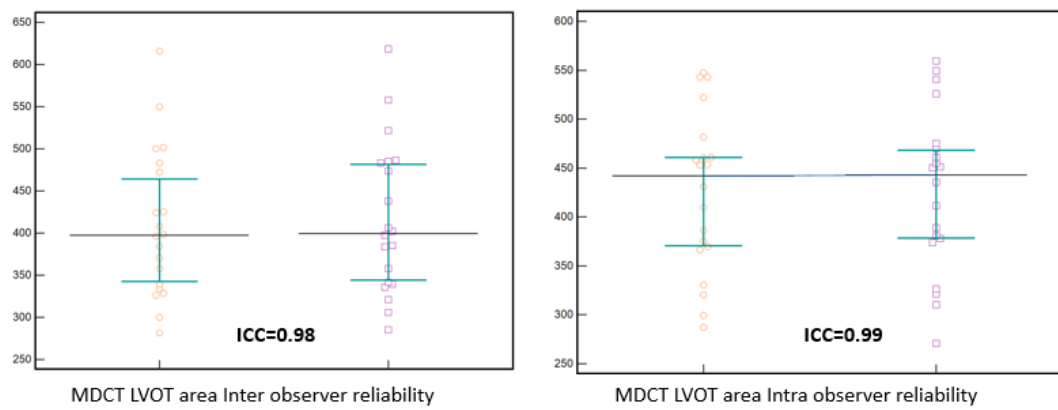

Figure S2: MDCT LVOT measurement; Inter observer (Left) and Intra observer reliability (Right) with excellent ICCs.

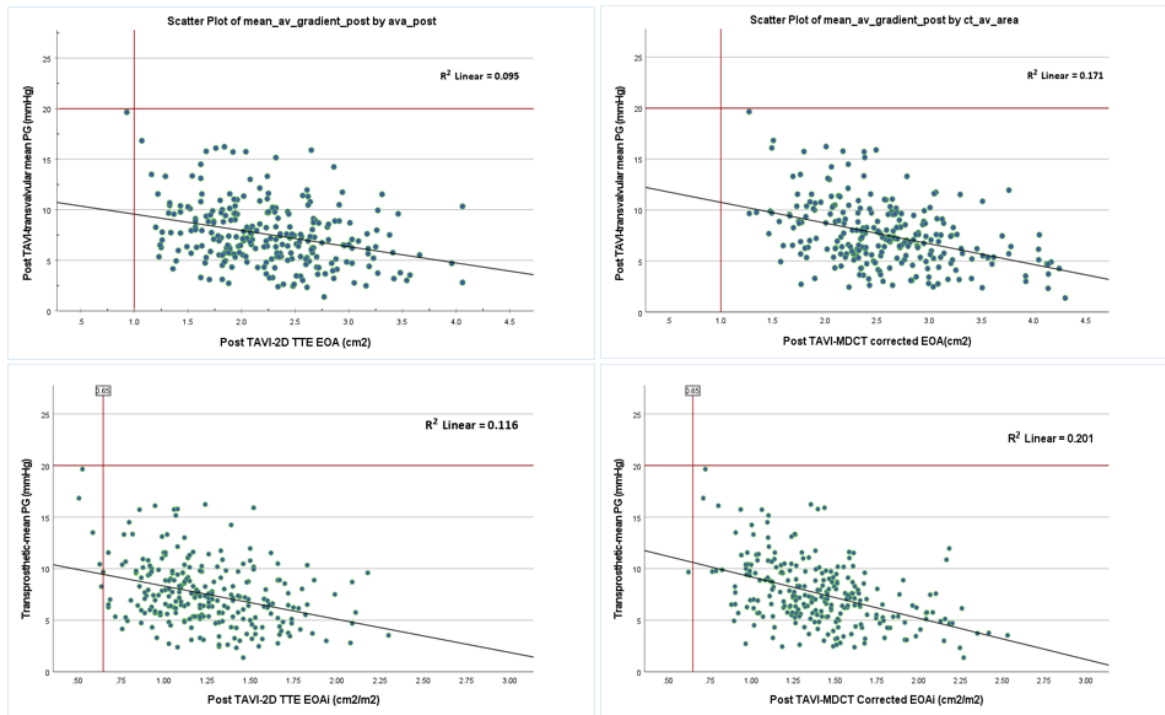

Figure S3: Scatter plots of the mean transvalvular gradient and EOA-2D TTE (Upper left), EOAI-2D TTE (Lower left), MDCT corrected EOA (upper right), MDCT corrected EOAI (Lower right) with a slightly better coefficient of determination ( $R^2$ ) with the MDCT corrected parameters.

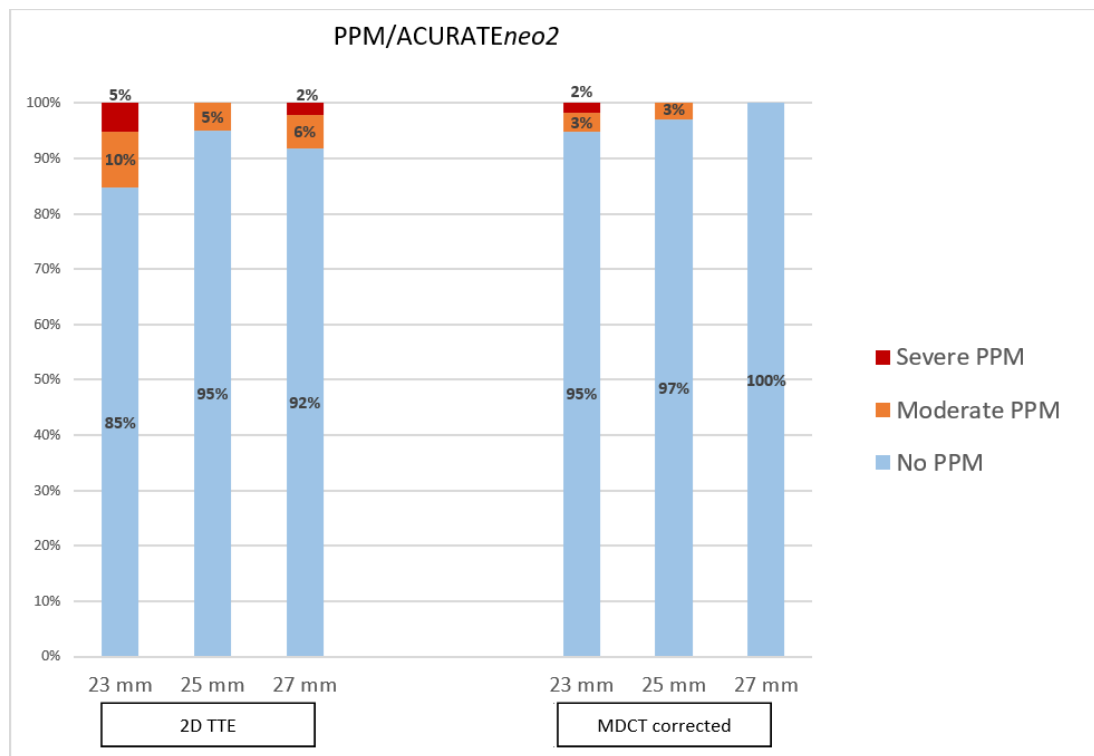

Figure S4: PPM (BMI adjusted) incidence, assessed by the 2D TTE and MDCT corrected methods and classified per ACURATeneo2 size.

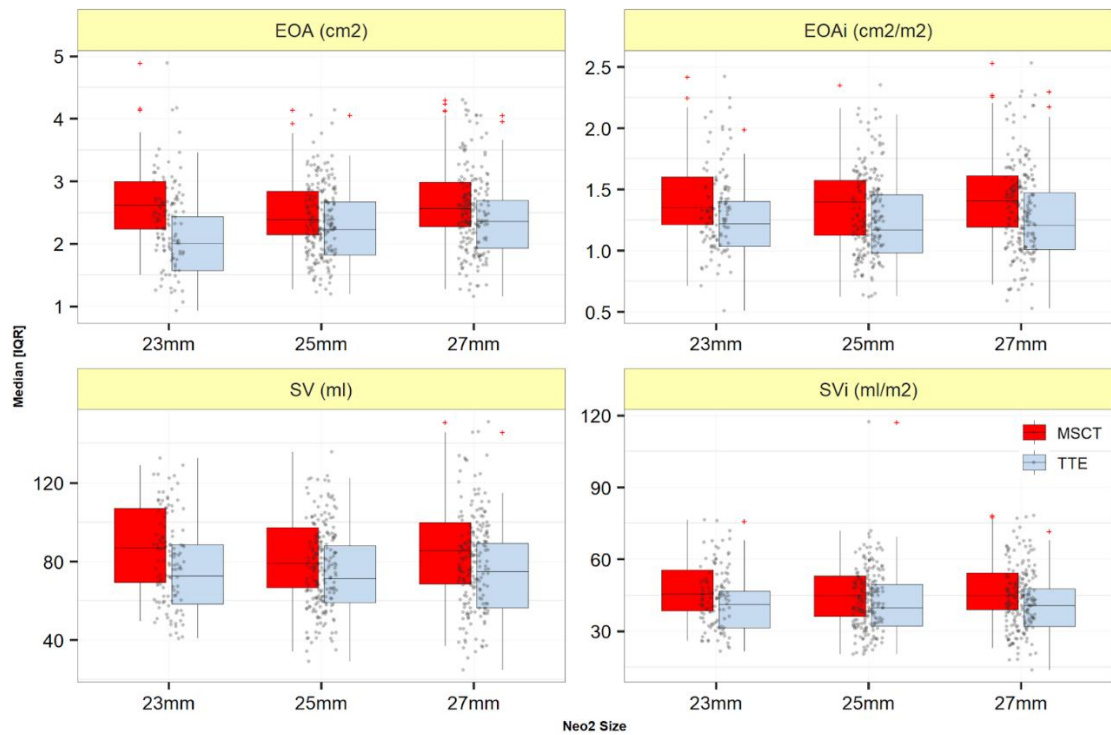

Figure S5: Inter valve size difference according to EOA, EOAI, SV and SVi per valve size.
